# Supplementary material for: Vertically-aligned growth of CuAl-layered double oxides on reduced graphene oxide for hybrid capacitive deionization with superior performance
Source: Royal Society of Chemistry journal article supplement (doi:10.1039/c9en01238a), 2020-01-01
Supplement: c9en01238a1.pdf [file c9en01238a1.pdf]

## Supporting information

# Vertical-aligned Growth of CuAl-layered Doubles Oxides on Reduced Graphene Oxide for Hybrid Capacitive Deionization with Superior Performance

Wen Xi, Haibo Li \*

Ningxia Key Laboratory of Photovoltaic Materials, Ningxia University, Yinchuan, Ningxia, 750021, P.R.

China, Fax/Tel: +86 0951 2062414; E-mail: [lihaibo@nxu.edu.cn](mailto:lihaibo@nxu.edu.cn) (Haibo Li)

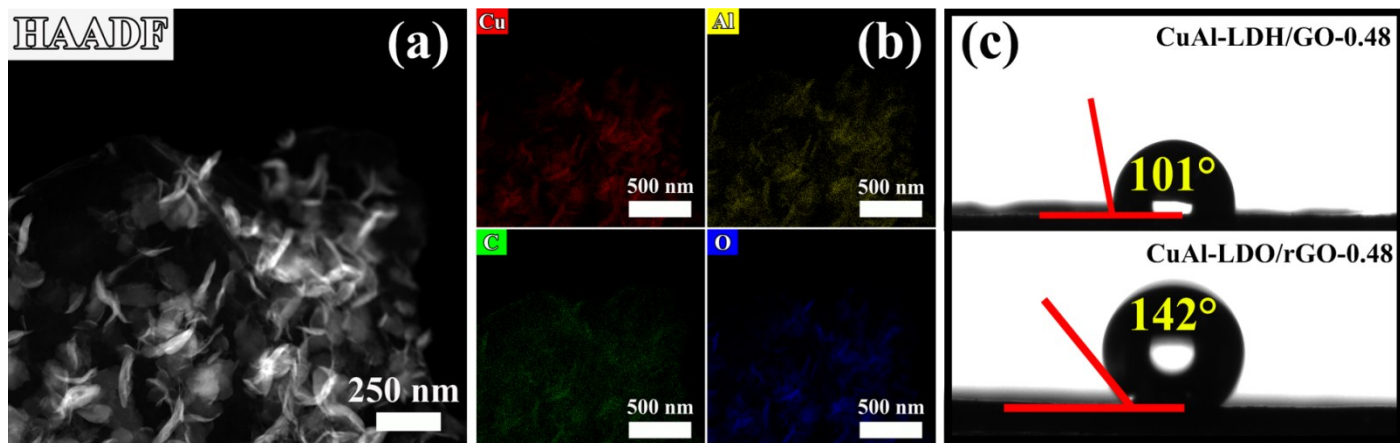

**Figure S1** (a) HAADF image, (b) elemental mapping of CuAl-LDH/GO-0.48 with Cu, Al, C and O, (c) contact angle image of CuAl-LDH/GO-0.48 and CuAl-LDO/rGO-0.48.

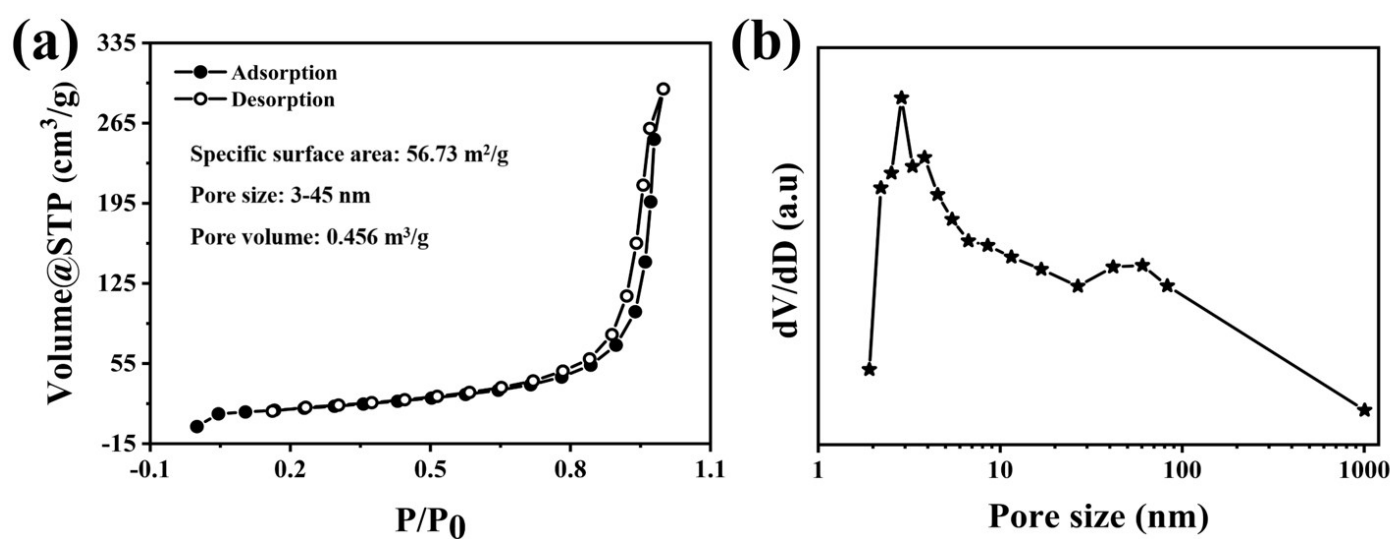

**Figure S2** (a)  $N_2$  adsorption-desorption isotherm and (b) pore size distribution of CuAl-LDO.

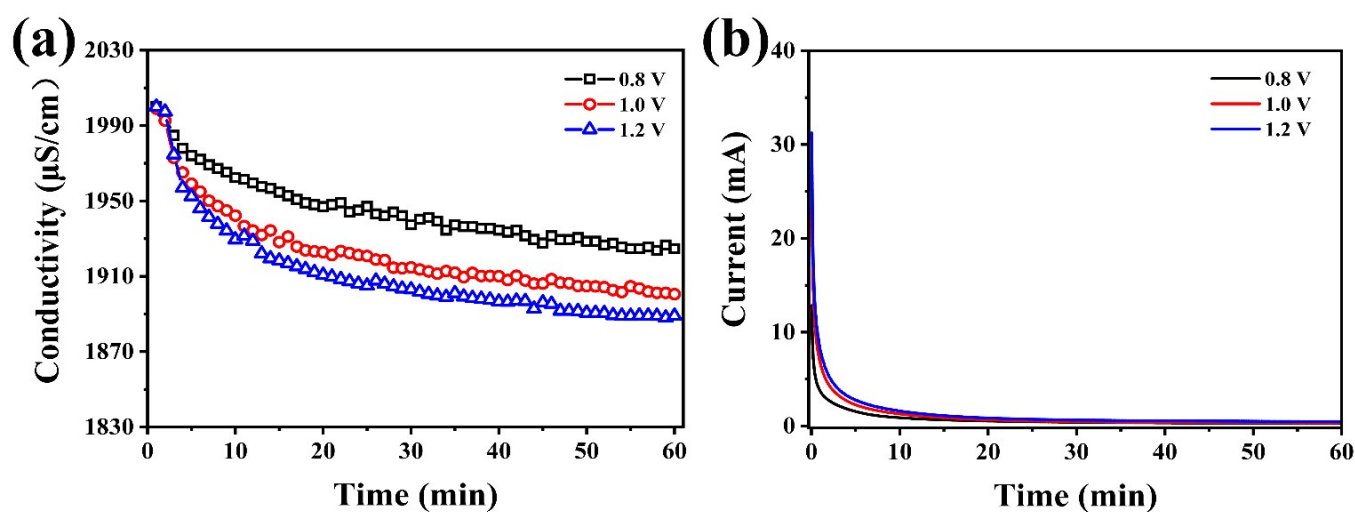

**Figure S3** (a) The electrosorption curve of rGO, (b) corresponding current response.
